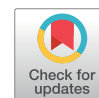

# Disclosures: *Standards of Medical Care in Diabetes—2019*

*Diabetes Care* 2019;42(Suppl. 1):S184–S186 | <https://doi.org/10.2337/dc19-SDIS01>

**Committee members disclosed the following financial or other conflicts of interest covering the period 12 months before December 2018**

| Member                                           | Employment                                                                   | Research grant                                                                          | Other research support | Speakers' bureau/ honoraria                                                          | Ownership interest | Consultant/ advisory board                                                                                                   | Other             |
|--------------------------------------------------|------------------------------------------------------------------------------|-----------------------------------------------------------------------------------------|------------------------|--------------------------------------------------------------------------------------|--------------------|------------------------------------------------------------------------------------------------------------------------------|-------------------|
| <b>Professional Practice Committee</b>           |                                                                              |                                                                                         |                        |                                                                                      |                    |                                                                                                                              |                   |
| Joshua J. Neumiller, PharmD, CDE, FASCP, Chair   | Washington State University                                                  | None                                                                                    | None                   | <i>Diabetes Spectrum</i> (Editorial)                                                 | None               | None                                                                                                                         | None              |
| Christopher P. Cannon, MD                        | Brigham and Women's Hospital                                                 | Amgen*, Boehringer Ingelheim*, Bristol-Myers Squibb*, Daiichi Sankyo*, Janssen*, Merck* | None                   | None                                                                                 | None               | Alnylam, Amarin, Amgen, Boehringer Ingelheim*, Bristol-Myers Squibb, Eisai, Janssen, Kowa, Merck, Pfizer, Regeneron, Sanofi* | None              |
| Jill Crandall, MD                                | Albert Einstein College of Medicine                                          | None                                                                                    | None                   | Data and Safety Monitoring Board for National Institutes of Health-sponsored studies | None               | None                                                                                                                         | None              |
| David D'Alessio, MD                              | Duke University, Division of Endocrinology                                   | Merck, Eli Lilly, vTv Therapeutics                                                      | None                   | <i>Diabetes Care, Diabetes</i> (Editorial)                                           | None               | Eli Lilly                                                                                                                    | Endocrine Society |
| Ian H. de Boer, MD, MS                           | University of Washington                                                     | None                                                                                    | Medtronic, Abbott      | None                                                                                 | None               | Ironwood                                                                                                                     | None              |
| Mary de Groot, PhD                               | Indiana University School of Medicine Diabetes Translational Research Center | None                                                                                    | None                   | <i>Diabetes Care</i> (Editorial)                                                     | None               | Johnson & Johnson Diabetes Institute, Eli Lilly                                                                              | None              |
| Judith Fradkin, MD                               | National Institute of Diabetes and Digestive and Kidney Diseases (NIDDK)     | None                                                                                    | None                   | None                                                                                 | None               | None                                                                                                                         | None              |
| Kathryn Evans Kreider, DNP, APRN, FNP-BC, BC-ADM | Duke University Medical Center                                               | None                                                                                    | None                   | None                                                                                 | None               | Amgen                                                                                                                        | None              |

| Member                                                                       | Employment                                                   | Research grant                                                                                                                                                   | Other research support | Speakers' bureau/ honoraria           | Ownership interest | Consultant/ advisory board                                                                                                                                   | Other                                                                                |
|------------------------------------------------------------------------------|--------------------------------------------------------------|------------------------------------------------------------------------------------------------------------------------------------------------------------------|------------------------|---------------------------------------|--------------------|--------------------------------------------------------------------------------------------------------------------------------------------------------------|--------------------------------------------------------------------------------------|
| David Maahs, MD, PhD                                                         | Stanford University, School of Medicine                      | National Institutes of Health, JDRF, National Science Foundation, Helmsley Charitable Trust, Medtronic#, Dexcom#, Insulet#, Bigfoot Biomedical#, Tandem#, Roche# | None                   | None                                  | None               | Abbott, Eli Lilly, Helmsley Charitable Trust, Insulet, Sanofi                                                                                                | Secretary-General of the International Society for Pediatric and Adolescent Diabetes |
| Nisa Maruthur, MD, MHS                                                       | Johns Hopkins University                                     | None                                                                                                                                                             | None                   | None                                  | None               | None                                                                                                                                                         | None                                                                                 |
| Medha N. Munshi, MD                                                          | Beth Israel Deaconess Medical Center, Harvard Medical School | Sanofi, Dexcom                                                                                                                                                   | None                   | None                                  | None               | Sanofi, Eli Lilly                                                                                                                                            | None                                                                                 |
| Maria Jose Redondo, MD, PhD, MPH                                             | Texas Children's Hospital–Baylor College of Medicine         | Medtronic, Caladrius                                                                                                                                             | None                   | None                                  | None               | None                                                                                                                                                         | None                                                                                 |
| Guillermo E. Umpierrez, MD, CDE, FACE, FACP                                  | Emory University                                             | Merck#, Sanofi#, Novo Nordisk#, Insulcloud#                                                                                                                      | None                   | None                                  | None               | Sanofi, Janssen                                                                                                                                              | <i>BMJ Open Diabetes Research &amp; Care</i> Editor in Chief                         |
| Jennifer Wyckoff, MD                                                         | University of Michigan                                       | None                                                                                                                                                             | None                   | None                                  | None               | Epic Endocrine Steering Committee                                                                                                                            | None                                                                                 |
| <b>ADA Nutrition Consensus Report Writing Group—Liaison</b>                  |                                                              |                                                                                                                                                                  |                        |                                       |                    |                                                                                                                                                              |                                                                                      |
| Melinda Maryniuk, MEd, RDN, CDE                                              | Maryniuk & Associates Diabetes and Nutrition Consultants     | None                                                                                                                                                             | None                   | None                                  | None               | None                                                                                                                                                         | None                                                                                 |
| <b>American College of Cardiology—Designated Representative (Section 10)</b> |                                                              |                                                                                                                                                                  |                        |                                       |                    |                                                                                                                                                              |                                                                                      |
| Sandeep Das, MD, MPH, FACC                                                   | University of Texas Southwestern Medical Center              | None                                                                                                                                                             | None                   | <i>Circulation</i> (Associate Editor) | None               | None                                                                                                                                                         | None                                                                                 |
| Mikhail Kosiborod, MD, FACC                                                  | University of Missouri-Kansas City School of Medicine        | AstraZeneca*, Boehringer Ingelheim*                                                                                                                              | None                   | None                                  | None               | AstraZeneca*, Sanofi*, GlaxoSmithKline, Amgen*, Boehringer Ingelheim*, Novo Nordisk*, Merck (Diabetes)*, Eisai*, Glytec, Janssen*, Intarcia, Novartis, Bayer | None                                                                                 |
| <b>American Diabetes Association Staff</b>                                   |                                                              |                                                                                                                                                                  |                        |                                       |                    |                                                                                                                                                              |                                                                                      |
| William T. Cefalu, MD                                                        | American Diabetes Association                                | None                                                                                                                                                             | None                   | None                                  | None               | None                                                                                                                                                         | None                                                                                 |
| Erika Gebel Berg, PhD                                                        | American Diabetes Association                                | None                                                                                                                                                             | None                   | None                                  | None               | None                                                                                                                                                         | None                                                                                 |
| Mindy Saraco, MHA                                                            | American Diabetes Association                                | None                                                                                                                                                             | None                   | None                                  | None               | None                                                                                                                                                         | None                                                                                 |

| Member                     | Employment                    | Research grant | Other research support | Speakers' bureau/ honoraria | Ownership interest | Consultant/ advisory board | Other |
|----------------------------|-------------------------------|----------------|------------------------|-----------------------------|--------------------|----------------------------|-------|
| Matthew P. Petersen        | American Diabetes Association | None           | None                   | None                        | None               | None                       | None  |
| Sacha Uelmen, RDN, CDE     | American Diabetes Association | None           | None                   | None                        | None               | None                       | None  |
| Shamera Robinson, MPH, RDN | American Diabetes Association | None           | None                   | None                        | None               | None                       | None  |

\*≥\$10,000 per year from company to individual; #grant or contract is to university or other employer.
